# Supplementary material for: Metrics for comparing neuronal tree shapes based on persistent homology
Source: PubMed Central journal article supplement (PMC5557505; doi:10.1371/journal.pone.0182184), 2017-08-15
Supplement: pone.0182184.s002.pdf [file pone.0182184.s002.pdf]

Supplement S2 :  
*Additional Details for Experimental Results*

**Using Euclidean distance as descriptor function.** In Table 1, we provide the number of hits and success-rates for  $k$ -nearest neighbor classification based on persistence diagrams ( $d_P$ ) and persistence-vectors ( $d_V$ ) using Euclidean distance function as descriptor function. We note that the success-rates are comparable to (but slightly worse than) those obtained from the geodesic distance descriptor function.

Table 1: Leave-one-out cross validation for  $k$ -NN classification using Euclidean distance function as descriptor function

| # nearest neighbors $k$ | # neurons classified correctly / success-rate for Dataset 1 |                   |
|-------------------------|-------------------------------------------------------------|-------------------|
|                         | Persist-distance $d_P$                                      | Persist-vec $d_V$ |
| 1                       | 123 / 0.3555                                                | 166 / 0.4798      |
| 2                       | 152 / 0.4393                                                | 200 / 0.5780      |
| 3                       | 164 / 0.4740                                                | 221 / 0.6387      |
| 4                       | 189 / 0.5462                                                | 238 / 0.6879      |
| 5                       | 203 / 0.5867                                                | 245 / 0.7081      |

**Comparison with L-Measure quantities.** We also compare our persistence-based features with specially-designed summaries of neuron morphology contained in L-Measure [1]. This experiment is carried out for Dataset 1. We use only those L-Measure parameters reported in the meta-data associated to each neuron in NeuroMorpho.Org [2], which can be considered as common L-Measure quantities. These parameters are listed in Table 2 – We exclude the parameter “Soma surface” and “Number of stems” as the first one is not reported (i.e, ‘N/A’) for neurons in Dataset 1, and the second one is the same for all of them. For each individual parameter, we also list the success-rate of  $k$ -nearest neighbor classification when the distance between two neurons is computed based on this parameter alone (defined as the absolute difference between its values for the two neurons).

Table 2: Leave-one-out cross validation using each parameter alone for Dataset1

| L-Measure Parameters          | Results for different number of nearest neighbors |             |              |              |              |
|-------------------------------|---------------------------------------------------|-------------|--------------|--------------|--------------|
|                               | 1                                                 | 2           | 3            | 4            | 5            |
| Number of Bifurcations        | 52 / 0.1503                                       | 86 / 0.2486 | 100 / 0.2890 | 125 / 0.3613 | 150 / 0.4335 |
| Number of Branches            | 45 / 0.1301                                       | 81 / 0.2341 | 107 / 0.3092 | 127 / 0.3671 | 150 / 0.4335 |
| Overall Width                 | 19 / 0.0549                                       | 38 / 0.1098 | 54 / 0.1561  | 66 / 0.1908  | 80 / 0.2312  |
| Overall Height                | 52 / 0.1503                                       | 92 / 0.2659 | 105 / 0.3035 | 118 / 0.3410 | 133 / 0.3844 |
| Overall Depth                 | 30 / 0.0867                                       | 53 / 0.1532 | 74 / 0.2139  | 93 / 0.2688  | 103 / 0.2977 |
| Average Diameter              | 23 / 0.0665                                       | 50 / 0.1445 | 64 / 0.1850  | 69 / 0.1994  | 78 / 0.2254  |
| Total Length                  | 46 / 0.1329                                       | 77 / 0.2225 | 101 / 0.2919 | 120 / 0.3468 | 135 / 0.3902 |
| Total Surface                 | 42 / 0.1214                                       | 71 / 0.2052 | 104 / 0.3006 | 131 / 0.3786 | 151 / 0.4364 |
| Total Volume                  | 52 / 0.1503                                       | 85 / 0.2457 | 111 / 0.3208 | 126 / 0.3642 | 136 / 0.3931 |
| Max Euclidean Distance        | 51 / 0.1474                                       | 84 / 0.2428 | 117 / 0.3382 | 147 / 0.4249 | 168 / 0.4855 |
| Max Path Distance             | 41 / 0.1185                                       | 66 / 0.1908 | 78 / 0.2254  | 94 / 0.2717  | 111 / 0.3208 |
| Max Branch Order              | 26 / 0.0751                                       | 56 / 0.1618 | 66 / 0.1908  | 79 / 0.2283  | 86 / 0.2486  |
| Average Contraction           | 9 / 0.0260                                        | 11 / 0.0318 | 19 / 0.0549  | 33 / 0.0954  | 33 / 0.0954  |
| Total Fragmentation           | 46 / 0.1329                                       | 79 / 0.2283 | 102 / 0.2948 | 118 / 0.3410 | 129 / 0.3728 |
| Partition Asymmetry           | 13 / 0.0376                                       | 29 / 0.0838 | 45 / 0.1301  | 60 / 0.1734  | 58 / 0.1676  |
| Average Rall's Ratio          | 6 / 0.0173                                        | 24 / 0.0694 | 46 / 0.1329  | 52 / 0.1503  | 58 / 0.1676  |
| Avg. Bifurcation angle local  | 14 / 0.0405                                       | 29 / 0.0838 | 37 / 0.1069  | 46 / 0.1329  | 65 / 0.1879  |
| Avg. Bifurcation angle remote | 32 / 0.0925                                       | 48 / 0.1387 | 72 / 0.2081  | 92 / 0.2659  | 104 / 0.3006 |
| Fractal Dimension             | 5 / 0.0145                                        | 18 / 0.0520 | 24 / 0.0694  | 33 / 0.0954  | 41 / 0.1185  |

Next, we create a new feature-vector, denoted by  $L_T$ , for each neuron  $T$  from  $\mathcal{S} = \text{Dataset 1}$ , where  $L_T$  simply consists of all the L-Measure quantities listed in Table 2. To compare two neurons under this feature vectorization, we use normalized  $L_2$ -norm between two vectors  $L_{T_1}$  and  $L_{T_2}$ . In particular, for the  $i$ -th parameter  $p_i$ , we first compute the mean  $\mu_i$  and standard deviation  $\sigma_i$  of it from its values over all neurons in  $\mathcal{S}$  (Dataset 1); i.e,  $\mu_i = \frac{1}{|\mathcal{S}|} \sum_{T \in \mathcal{S}} L_T[i]$  and  $\sigma_i = \sqrt{\frac{\sum_{T \in \mathcal{S}} (L_T[i] - \mu_i)^2}{|\mathcal{S}|}}$ . Here,  $L_T[i]$  stands for the  $i$ -th entry of vector  $L_T$ , which is the value of this parameter  $p_i$  for neuron  $T$ . Let  $\ell$  denote the total number of L-Measure quantities we consider (i.e, the dimension of the feature vector  $L_T$ ). The normalized  $L_2$ -distance between two feature vectors  $L_{T_1}$  and  $L_{T_2}$  is defined as:

$$d_L(T_1, T_2) = \left[ \sum_{i=1}^{\ell} \left( \frac{L_{T_1}[i] - \mu_i}{\sigma_i} - \frac{L_{T_2}[i] - \mu_i}{\sigma_i} \right)^2 \right]^{1/2}.$$

In other words, this is the standard  $L_2$ -distance between  $L_{T_1}$  and  $L_{T_2}$  after each entry is normalized by its respective mean and variance.

The comparison of  $k$ -nearest neighbor classification accuracy is reported in Figure 7 (B) in the main text of the submission.

## References

- [1] Scorcioni R, Polavaram S, Ascoli GA. L-Measure: A web-accessible tool for the analysis, comparison and search of digital reconstructions of neuronal morphologies. *Nature Protocols*. 2008;3(5):866–876.
- [2] Ascoli GA, Dohohue DE, Halavi M. NeuroMorpho.Org: A central resource for neuronal morphologies. *J Neurosci*. 2007;27(35):9247–51.
